# Supplementary material
Source: publisher figshare collection journal article supplement (https://acs.figshare.com/ndownloader/files/18286127)
Supplement: Supplementary file 1 [file 18286127]

# Supporting Information

## Impacts of Ethanol and Water Adsorptions on Thermal Conductivity of ZIF-8

*Wei Wei<sup>1,2</sup>, Jun Huang,<sup>3</sup> Wei Li<sup>2</sup>, Haiyan Peng<sup>1\*</sup>, Song Li<sup>2\*</sup>*

<sup>1</sup>Key Lab for Material Chemistry of Energy Conversion and Storage, Ministry of Education, School of Chemistry and Chemical Engineering, Huazhong University of Science and Technology, Wuhan 430074, China

<sup>2</sup>State Key Laboratory of Coal Combustion, School of Energy and Power Engineering, Huazhong University of Science and Technology, Wuhan 430074, Hubei, China

<sup>3</sup>Key Laboratory for Thermal Science and Power Engineering of Ministry of Education, Department of Engineering Mechanics, Tsinghua University, Beijing, 100084, China

## 1. Force field parameters

The force field of ZIF-8 with structural flexibility has been developed by Hu et al<sup>1</sup>, which can accurately describe the crystalline, mechanical, and thermophysical properties of ZIF-8.<sup>1</sup> In this force field, the bonded interactions include stretching, bending and proper and improper torsional potentials as described by following equations.

$$U_{\text{stretching}} = \sum \frac{1}{2} k_r (r_{ij} - r_{ij}^0)^2 \quad (1)$$

$$U_{\text{bending}} = \sum \frac{1}{2} k_\theta (\theta_{ijk} - \theta_{ijk}^0)^2 \quad (2)$$

$$U_{\text{proper}} = \sum k_\phi [1 + \cos(m\phi_{ijkl} - \phi_{ijkl}^0)] \quad (3)$$

$$U_{\text{improper}} = \sum k_\xi [1 + \cos(\xi_{ijkl} - \xi_{ijkl}^0)] \quad (4)$$

where  $k_r$ ,  $k_\theta$ ,  $k_\phi$ , and  $k_\xi$  are the force constants;  $r_{ij}$ ,  $\theta_{ijk}$ ,  $\phi_{ijkl}$ , and  $\xi_{ijkl}$  are bond lengths and angles, proper and improper dihedrals, respectively;  $r_{ij}^0$ ,  $\theta_{ijk}^0$ ,  $\phi_{ijkl}^0$ , and  $\xi_{ijkl}^0$  are the equilibrated bond length and angles;  $m$  is the multiplicity. The nonbonded interactions include Lennard-Jones (LJ) and Coulombic potentials.

$$U_{\text{LJ}} = \sum 4\epsilon_{ij} \left[ \left( \frac{\sigma_{ij}}{r_{ij}} \right)^{12} - \left( \frac{\sigma_{ij}}{r_{ij}} \right)^6 \right] \quad (5)$$

$$U_{\text{Coulombic}} = \sum \frac{q_i q_j}{4\pi\epsilon_0 r_{ij}} \quad (6)$$

where  $\sigma_{ij}$  and  $\epsilon_{ij}$  are collision diameter and well depth, respectively;  $q_i$  is atomic charge;  $\epsilon_0 = 8.8542 \times 10^{-12} \text{ C}^2 \text{N}^{-1} \text{m}^{-2}$  is vacuum permittivity.

Ethanol is modeled by the TraPPE<sup>2</sup> force field, in which  $\text{CH}_x$  groups are treated as pseudoatoms located at the sites of the carbon atoms. Whereas the other atoms (e.g., hydroxyl O and H) are modeled explicitly. All bond lengths are fixed<sup>2</sup> ( $\text{CH}_3\text{-CH}_2$  : 0.1540 nm ;  $\text{CH}_3\text{-OH}$ : 0.1430 nm; O-

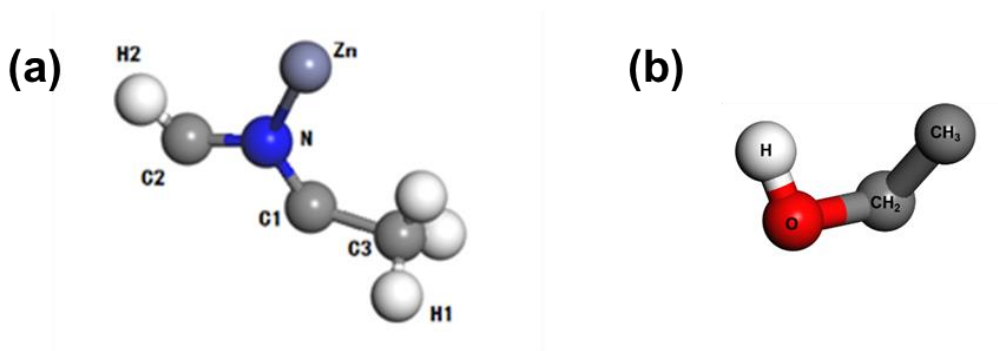

**Fig. S1.** (a) Atomic types in ZIF-8 and (b) ethanol model

H: 0.0945 nm). The torsional potentials used to restrict the dihedral from the OPLS-UA force field<sup>3</sup> with the Fourier coefficients.<sup>2</sup>

$$U_{\text{proper}} = c_0 + c_1[1 + \cos(\phi)] + c_2[1 - \cos(2\phi)] + c_3[1 + \cos(3\phi)] \quad (7)$$

In the TIP4P/2005 model<sup>4</sup>, each water molecule has four interaction sites, including a massless M-site located coplanar with the oxygen (O) and hydrogen (H) sites on the bisector of the H–O–H bond angle. The O–H bond length and the H–O–H bond angle are fixed as 0.9572 Å and 104.52°, respectively. Detailed parameters were provided in Table S1-S4.

**Table S1.** Parameters for bond stretching in ZIF-8 and guest molecules.

| <b>Bond stretching</b> |                                  |                                           |            |
|------------------------|----------------------------------|-------------------------------------------|------------|
| Species                | <i>i-j</i>                       | $k_r$ ( $10^5$ kJ/(mol nm <sup>2</sup> )) | $r_0$ (nm) |
| <b>ZIF-8</b>           | Zn-N                             | 0.7000                                    | 0.1987     |
|                        | N-C1                             | 4.0836                                    | 0.1340     |
|                        | N-C2                             | 3.4309                                    | 0.1371     |
|                        | C1-C3                            | 2.6527                                    | 0.1493     |
|                        | C2-C2                            | 4.3346                                    | 0.1346     |
|                        | C2-H2                            | 3.0710                                    | 0.0929     |
|                        | C3-H1                            | 2.8451                                    | 0.0960     |
| <b>Ethanol (fixed)</b> | CH <sub>3</sub> -CH <sub>2</sub> | 1.8628                                    | 0.1540     |
|                        | CH <sub>2</sub> -OH              | 3.5830                                    | 0.1430     |
|                        | O-H                              | 4.5626                                    | 0.0945     |
| <b>Water (fixed)</b>   | OW-HW                            | 5.0264                                    | 0.0957     |

**Table S2.** Parameters for bond bending potentials in ZIF-8 and guest molecules

| <b>Bond bending</b>  |                                        |                               |                     |
|----------------------|----------------------------------------|-------------------------------|---------------------|
| Species              | <i>i-j-k</i>                           | $k_{\theta}$ ( $10^2$ kJ/mol) | $\theta_0$ (degree) |
| <b>ZIF-8</b>         | N-Zn-N                                 | 1.0000                        | 109.47              |
|                      | Zn-N-C1                                | 1.7000                        | 128.35              |
|                      | Zn-N-C2                                | 1.8000                        | 126.40              |
|                      | C1-N-C2                                | 5.8576                        | 105.24              |
|                      | N-C1-N                                 | 5.8576                        | 112.17              |
|                      | N-C1-C3                                | 5.8576                        | 123.89              |
|                      | N-C2-C2                                | 5.8576                        | 108.67              |
|                      | N-C2-H2                                | 4.1840                        | 125.66              |
|                      | C2-C2-H2                               | 4.1840                        | 125.67              |
|                      | C1-C3-H1                               | 4.1840                        | 109.44              |
|                      | H1-C3-H1                               | 2.9288                        | 109.50              |
| <b>Ethanol</b>       | CH <sub>3</sub> -(CH <sub>2</sub> )-OH | 4.1922                        | 109.50              |
|                      | CH <sub>2</sub> -(O)-H                 | 4.6082                        | 108.50              |
| <b>Water (fixed)</b> | HW-OW-HW                               | 6.2830                        | 104.52              |

**Table S3.** Parameters for proper and improper torsional potentials in ZIF-8 and ethanol.

| Proper torsional   |                                           |                     |                     |                |                |
|--------------------|-------------------------------------------|---------------------|---------------------|----------------|----------------|
| Species            | <i>i-j-k-l</i>                            | $k_{\Phi}$ (kJ/mol) | $\theta_0$ (degree) |                |                |
| <b>ZIF-8</b>       | Zn-N-C1-N                                 | 0.5000              | 180                 |                |                |
|                    | Zn-N-C1-C3                                | 0.5000              | 180                 |                |                |
|                    | C2-N-C1-N                                 | 20.0832             | 180                 |                |                |
|                    | C2-N-C1-C3                                | 20.0832             | 180                 |                |                |
|                    | Zn-N-C2-C2                                | 0.5000              | 180                 |                |                |
|                    | Zn-N-C2-H2                                | 0.5000              | 180                 |                |                |
|                    | C1-N-C2-C2                                | 20.0832             | 180                 |                |                |
|                    | C1-N-C2-H2                                | 20.0832             | 180                 |                |                |
|                    | N-C2-C2-N                                 | 16.7360             | 180                 |                |                |
|                    | N-C2-C2-H2                                | 16.7360             | 180                 |                |                |
|                    | H2-C2-C2-H2                               | 16.7360             | 180                 |                |                |
| <b>Ethanol</b>     | <i>i-j-k-l</i>                            | $C_0$ (kJ/mol)      | $C_1$ (kJ/mol)      | $C_2$ (kJ/mol) | $C_3$ (kJ/mol) |
|                    | CH <sub>3</sub> -(CH <sub>2</sub> )-(O)-H | 0                   | 3.4906              | -0.4853        | 3.1264         |
| Improper torsional |                                           |                     |                     |                |                |
| Species            | <i>i-j-k-l</i>                            | $k_{\xi}$ (kJ/mol)  | $\zeta_0$ (degree)  |                |                |
| <b>ZIF-8</b>       | N-Zn-C1-C2                                | 0.4000              | 180                 |                |                |
|                    | C1-N-N-C3                                 | 4.6024              | 180                 |                |                |
|                    | C2-N-C2-H2                                | 4.6024              | 180                 |                |                |

**Table S4.** Lennard-Jones parameters and atomic charges in ZIF-8 and guest molecules.

| Species        | Atoms           | $\sigma$ (nm) | $\varepsilon$ (kJ/mol) | $q$ (e) |
|----------------|-----------------|---------------|------------------------|---------|
| <b>ZIF-8</b>   | Zn              | 0.1960        | 0.0523                 | +1.0    |
|                | N               | 0.3250        | 0.7113                 | -0.5    |
|                | C1              | 0.3400        | 0.3598                 | +0.5    |
|                | C2              | 0.3400        | 0.3598                 | -0.1    |
|                | C3              | 0.3400        | 0.4577                 | -0.3    |
|                | H1              | 0.2650        | 0.0657                 | +0.1    |
|                | H2              | 0.2421        | 0.0628                 | +0.1    |
| <b>Ethanol</b> | CH <sub>3</sub> | 0.3750        | 0.8152                 | 0       |
|                | CH <sub>2</sub> | 0.3950        | 0.3826                 | 0.2650  |
|                | O               | 0.3020        | 0.7736                 | -0.7000 |
|                | H               | 0             | 0                      | 0.4350  |
| <b>Water</b>   | OW              | 0.3159        | 0.1852                 | -1.1128 |
|                | HW              | 0             | 0                      | 0.5564  |

## 2. The effect of different water models on the thermal conductivity and interaction of ZIF-8

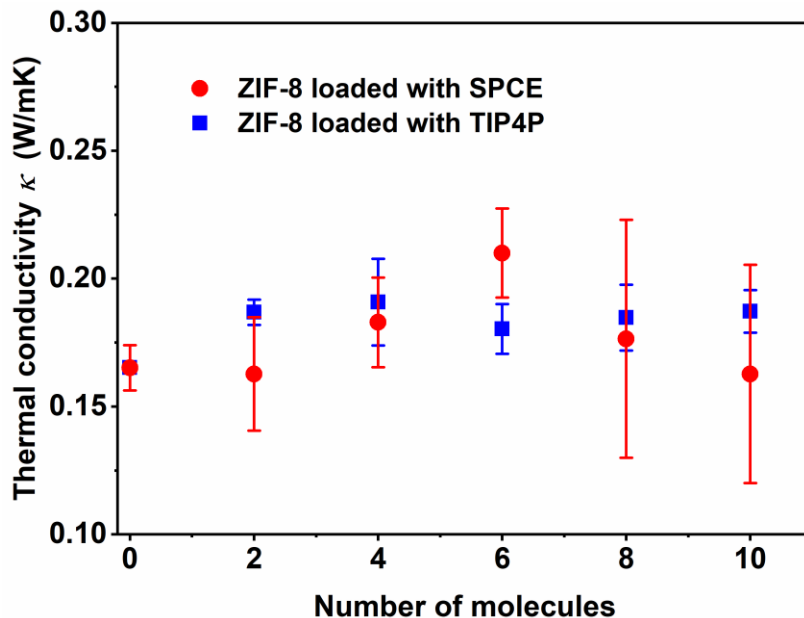

**Fig. S2.** The thermal conductivity of ZIF-8 loaded with water as a function of adsorbed number of water molecules. There are SPCE (red) and TIP4P (blue) water models, respectively.

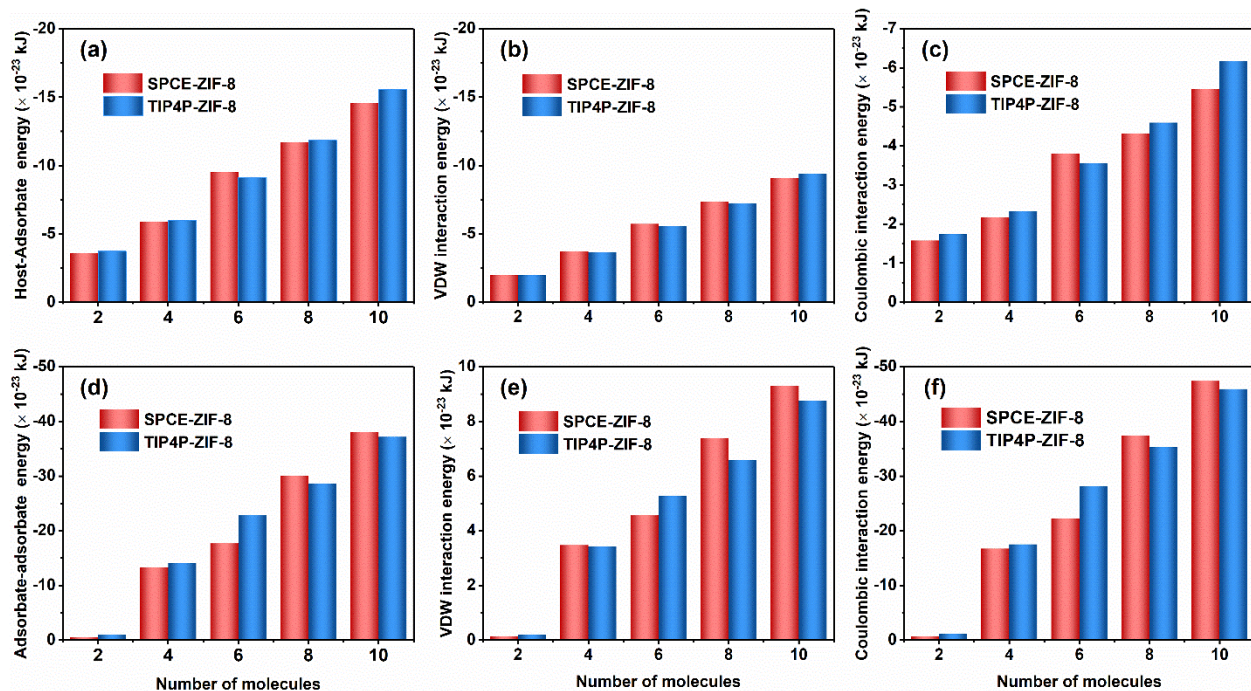

**Fig. S3.** (a) Host-adsorbate and (d) adsorbate-adsorbate interaction energy as well as the contributions from (b, e) van der Waals and (c, f) Coulombic interactions in ZIF-8 loaded with different water models (SPCE(red) and TIP4P(blue)).

## REFERENCES

- (1) Hu, Z.; Zhang, L.; Jiang, J. Development of a Force Field for Zeolitic Imidazolate Framework-8 with Structural Flexibility. *J. Chem. Phys.* **2012**, *136*, 244703.
- (2) Chen, B.; Potoff, J. J.; Siepmann, J. I. Monte Carlo Calculations for Alcohols and Their Mixtures with Alkanes. Transferable Potentials for Phase Equilibria. 5. United-Atom Description of Primary, Secondary, and Tertiary Alcohols. *J. Phys. Chem. B* **2001**, *105*, 3093-3104.
- (3) Jorgensen, W. L. Optimized Intermolecular Potential Functions for Liquid Alcohols. *J. Phys. Chem.* **1986**, *90*, 1276-1284.
- (4) Abascal, J. L.; Vega, C. A General Purpose Model for the Condensed Phases of Water: Tip4p/2005. *J. Chem. Phys.* **2005**, *123*, 234505.
